# Supplementary material for: Viral Metagenomics Reveals Diverse Viruses in Tissue Samples of Diseased Pigs
Source: MDPI journal article supplement (doi:10.3390/v14092048), 2022-09-15
Supplement: s1 [file s1]

| Library number | Library accession | Total reads | Viral reads with E value<10 <sup>-5</sup> | Obtained complete genome    | GenBank Accession no. |
|----------------|-------------------|-------------|-------------------------------------------|-----------------------------|-----------------------|
| Pig01          | SRR14099162       | 25, 925     | 2, 476                                    |                             |                       |
| Pig02          | SRR14099163       | 9, 026      | 131                                       |                             |                       |
| Pig03          | SRR14099194       | 72, 306     | 55                                        |                             |                       |
| Pig04          | SRR14099195       | 9, 408      | 428                                       |                             |                       |
| Pig05          | SRR14099196       | 50, 152     | 25, 466                                   | Parvovirus 2                | MW853943              |
| Pig06          | SRR14099197       | 92, 265     | 1, 948                                    |                             |                       |
| Pig07          | SRR14099198       | 62, 275     | 1, 342                                    | Parvovirus 2                | MW853944              |
| Pig08          | SRR14099199       | 11, 248     | 1, 120                                    | Circoviridae                | MW853933              |
| Pig09          | SRR14099212       | 41, 103     | 2, 240                                    | Circoviridae                | MW853934              |
| Pig10          | SRR14099213       | 10, 229     | 262                                       |                             |                       |
| Pig11          | SRR14099214       | 7, 642      | 268                                       |                             |                       |
| Pig12          | SRR14099229       | 54, 348     | 2, 656                                    |                             |                       |
| Pig13          | SRR14099237       | 97, 956     | 6, 706                                    |                             |                       |
| Pig14          | SRR14099238       | 54, 217     | 8, 761                                    | Circoviridae, Parvovirus 6  | MW853935, MW853954    |
| Pig15          | SRR14099239       | 58, 098     | 822                                       |                             |                       |
| Pig18          | SRR14099248       | 6, 634      | 1, 583                                    |                             |                       |
| Pig21          | SRR14099249       | 117, 712    | 1, 175                                    |                             |                       |
| Pig22          | SRR14099471       | 7, 113      | 239                                       |                             |                       |
| Pig23          | SRR14099472       | 7, 732      | 101                                       |                             |                       |
| Pig24          | SRR14099473       | 226, 205    | 8, 180                                    |                             |                       |
| Pig25          | SRR14099474       | 208, 211    | 13, 876                                   |                             |                       |
| Pig26          | SRR14099971       | 257, 651    | 2, 849                                    | Parvovirus 2                | MW853945              |
| Pig27          | SRR14100086       | 210, 484    | 4, 743                                    | Circoviridae                | MW853936              |
| Pig28          | SRR14100087       | 111, 997    | 7, 664                                    | Arteriviridae, Flaviviridae | MW853923, MW853924    |
| Pig29          | SRR14100100       | 71, 420     | 819                                       |                             |                       |
| Pig30          | SRR14100583       | 53, 803     | 2, 853                                    | Parvovirus 5                | MW853951              |
| Pig31          | SRR14100584       | 87, 896     | 791                                       |                             |                       |
| Pig32          | SRR14100585       | 101, 411    | 4, 167                                    | Flaviviridae                | MW853925              |
| Pig33          | SRR14100594       | 24, 930     | 109                                       |                             |                       |
| Pig34          | SRR14100603       | 96, 612     | 2, 861                                    |                             |                       |
| Pig35          | SRR14101505       | 89, 816     | 410                                       |                             |                       |
| Pig36          | SRR14101506       | 85, 538     | 5, 249                                    | Flaviviridae, Parvovirus 2  | MW853926, MW853946    |
| Pig37          | SRR14101520       | 197, 595    | 16, 077                                   | Flaviviridae                | MW853927              |
| Pig38          | SRR14101522       | 115, 079    | 1, 116                                    |                             |                       |

|       |             |          |         |                            |                    |
|-------|-------------|----------|---------|----------------------------|--------------------|
| Pig39 | SRR14101703 | 573, 245 | 7, 672  | Flaviviridae               | MW853928           |
| Pig40 | SRR14126926 | 147, 632 | 4, 781  |                            |                    |
| Pig41 | SRR14126927 | 100, 650 | 1, 125  |                            |                    |
| Pig42 | SRR14126929 | 152, 218 | 7, 372  | Flaviviridae               | MW853929           |
| Pig43 | SRR14126930 | 184, 502 | 3, 240  | Parvovirus 2               | MW853947           |
| Pig44 | SRR14126931 | 273, 946 | 8, 971  |                            |                    |
| Pig45 | SRR14126932 | 192, 211 | 981     |                            |                    |
| Pig46 | SRR14126933 | 109, 264 | 6, 307  |                            |                    |
| Pig47 | SRR14126934 | 219, 303 | 2, 943  |                            |                    |
| Pig48 | SRR14127098 | 194, 685 | 7, 990  | Circoviridae, Parvovirus 2 | MW853937, MW853948 |
| Pig49 | SRR14127099 | 70, 375  | 17, 953 | Circoviridae               | MW853938           |
| Pig50 | SRR14127129 | 542, 732 | 3, 886  | Circoviridae               | MW853939           |
| Pig51 | SRR14127130 | 183, 288 | 20, 570 | Circoviridae               | MW853940           |
| Pig52 | SRR14127132 | 126, 993 | 5, 029  |                            |                    |
| Pig53 | SRR14127133 | 124, 225 | 1, 586  |                            |                    |
| Pig54 | SRR14127134 | 66, 832  | 292     |                            |                    |
| Pig55 | SRR14127135 | 145, 583 | 1, 309  |                            |                    |
| Pig56 | SRR14127136 | 77, 627  | 3, 257  |                            |                    |
| Pig57 | SRR14127173 | 620, 706 | 1, 988  |                            |                    |
| Pig58 | SRR14127174 | 243, 608 | 11, 171 |                            |                    |
| Pig59 | SRR14127175 | 76, 622  | 1, 467  |                            |                    |
| Pig60 | SRR14127194 | 410, 072 | 8, 109  | Parvovirus 7               | MW853958           |
| Pig61 | SRR14127273 | 526, 967 | 8, 523  |                            |                    |
| Pig62 | SRR14127285 | 129, 425 | 3, 273  | Flaviviridae               | MW853930           |
| Pig63 | SRR14127288 | 89, 088  | 4, 194  | Flaviviridae               | MW853931           |
| Pig64 | SRR14127289 | 64, 789  | 2, 087  |                            |                    |
| Pig65 | SRR14127290 | 110, 910 | 1, 102  |                            |                    |
| Pig66 | SRR14127291 | 106, 516 | 4, 233  |                            |                    |
| Pig67 | SRR14127292 | 377, 270 | 1, 539  |                            |                    |
| Pig68 | SRR14127294 | 158, 203 | 11, 428 | Parvovirus 2               | MW853949           |
| Pig69 | SRR14127307 | 86, 201  | 799     |                            |                    |
| Pig70 | SRR14127350 | 192, 626 | 12, 554 |                            |                    |
| Pig71 | SRR14127351 | 355, 671 | 7, 437  |                            |                    |
| Pig72 | SRR14127364 | 102, 321 | 4, 408  | Parvovirus 3               | MW853950           |
| Pig73 | SRR14127384 | 547, 152 | 34, 021 | Parvovirus 6, Parvovirus 7 | MW853955, MW853959 |

|       |             |             |             |                                             |                              |
|-------|-------------|-------------|-------------|---------------------------------------------|------------------------------|
| Pig74 | SRR14127385 | 98, 843     | 1, 266      | Parvovirus 7                                | MW853960                     |
| Pig75 | SRR14127423 | 633, 748    | 196, 045    | Parvovirus 6, Parvovirus 7                  | MW853956, MW853961           |
| Pig76 | SRR14127424 | 73, 949     | 2, 538      |                                             |                              |
| Pig77 | SRR14127425 | 118, 950    | 1, 590      |                                             |                              |
| Pig78 | SRR14127426 | 26, 645     | 1, 428      |                                             |                              |
| Pig79 | SRR14127434 | 83, 958     | 990         |                                             |                              |
| Pig80 | SRR14127435 | 118, 229    | 5, 245      |                                             |                              |
| Pig81 | SRR14127459 | 471, 375    | 1, 934      |                                             |                              |
| Pig82 | SRR14127475 | 45, 077     | 2, 661      |                                             |                              |
| Pig83 | SRR14127483 | 417, 417    | 8, 534      |                                             |                              |
| Pig84 | SRR14127484 | 788, 060    | 31, 307     |                                             |                              |
| Pig85 | SRR14127534 | 615, 846    | 57, 355     | Circoviridae, Parvovirus 5,<br>Parvovirus 6 | MW853941, MW853952, MW853957 |
| Pig86 | SRR14127578 | 275, 809    | 8, 592      | Circoviridae, Parvovirus 5                  | MW853942, MW853953           |
| Pig87 | SRR14127579 | 218, 507    | 4, 013      |                                             |                              |
| Pig88 | SRR14127581 | 79, 864     | 2, 892      |                                             |                              |
| Pig89 | SRR14127586 | 82, 527     | 957         |                                             |                              |
| Pig90 | SRR14127601 | 1, 702, 271 | 1, 187, 870 |                                             |                              |
| Pig91 | SRR14127782 | 111, 474    | 1, 152      |                                             |                              |
| Pig92 | SRR14127784 | 67, 119     | 3, 344      | Parvovirus 7                                | MW853962                     |
| Pig93 | SRR14127787 | 124, 774    | 2, 315      | Flaviviridae                                | MW853932                     |
| Pig94 | SRR14127791 | 143, 366    | 8, 892      |                                             |                              |
