# Supplementary material for: Viral Metagenomics Reveals Diverse Viruses in Tissue Samples of Diseased Pigs
Source: MDPI journal article supplement (doi:10.3390/v14092048), 2022-09-15
Supplement: s1 [file s1]

| Sample number | Types of tissue samples                       | Sampling location | Pig age    | Clinical symptoms             | Whether the result of traditional method match with viral metagenomics or not |
|---------------|-----------------------------------------------|-------------------|------------|-------------------------------|-------------------------------------------------------------------------------|
| Pig01         | Liver、Lung、Lymph node                         | Anqing            | Nursery    | Respiratory symptoms          | N                                                                             |
| Pig02         | Liver、Spleen、Kidney                           | Huainan           | Nursery    | Respiratory symptoms          | N                                                                             |
| Pig03         | Liver、Spleen、Lymph node                       | Hefei             | Nursery    | Respiratory symptoms          | Y                                                                             |
| Pig04         | Lung、Lymph node                               | Hefei             | Nursery    | Respiratory symptoms          | N                                                                             |
| Pig05         | Lung                                          | Hefei             | Stillbirth | Reproductive disorders        | N                                                                             |
| Pig06         | Liver、Lymph node                              | Hefei             | Stillbirth | Reproductive disorders        | N                                                                             |
| Pig07         | Liver、Kidney                                  | Liuan             | Finishing  | Respiratory symptoms          | N                                                                             |
| Pig08         | Spleen、Lung                                   | Huangshan         | Nursery    | Respiratory symptoms          | Y                                                                             |
| Pig09         | Liver、Lymph node                              | Fuyang            | Nursery    | Respiratory symptoms          | N                                                                             |
| Pig10         | Liver、Spleen、Lung                             | Wannan            | Nursery    | Respiratory symptoms          | N                                                                             |
| Pig11         | Liver、Spleen、Lung、Kidney、Lymph node           | Fuyang            | Nursery    | Respiratory symptoms          | N                                                                             |
| Pig12         | Liver、Spleen、Lung                             | Hefei             | Stillbirth | Reproductive disorders        | Y                                                                             |
| Pig13         | Liver、Spleen                                  | Hefei             | Stillbirth | Reproductive disorders        | N                                                                             |
| Pig14         | Liver、Lung                                    | Hefei             | Nursery    | Respiratory symptoms          | data missing                                                                  |
| Pig15         | Lung                                          | Huaibei           | suckling   | Respiratory symptoms          | data missing                                                                  |
| Pig18         | Spleen、Lung                                   | Fuyang            | Stillbirth | Reproductive disorders        | N                                                                             |
| Pig21         | Lung、Kidney                                   | Huaibei           | suckling   | Reproductive disorders        | Y                                                                             |
| Pig22         | Liver、Spleen、Lung                             | Fuyang            | Nursery    | Acute death                   | data missing                                                                  |
| Pig23         | Spleen、Lung                                   | Fuyang            | Nursery    | Acute death                   | data missing                                                                  |
| Pig24         | Liver、Spleen                                  | Hefei             | Nursery    | Diarrhea                      | N                                                                             |
| Pig25         | Liver、Lung                                    | Hefei             | Nursery    | Diarrhea                      | N                                                                             |
| Pig26         | Lung                                          | Huaibei           | suckling   | Respiratory symptoms          | data missing                                                                  |
| Pig27         | Liver、Spleen、Lung                             | Chuzhou           | Finishing  | Diarrhea                      | Y                                                                             |
| Pig28         | Liver、Spleen、Lung、Kidney                      | Chuzhou           | Finishing  | Diarrhea                      | Y                                                                             |
| Pig29         | Liver、Spleen、Lung、Kidney、Lymph node<br>、Brain | Chuzhou           | Finishing  | Diarrhea                      | Y                                                                             |
| Pig30         | Liver、Spleen、Lung、Kidney                      | Bengbu            | Nursery    | Diarrhea、Respiratory symptoms | Y                                                                             |
| Pig31         | Liver、Spleen、Kidney                           | Chuzhou           | Nursery    | Diarrhea                      | Y                                                                             |
| Pig32         | Liver、Spleen、Lung、Kidney                      | Chuzhou           | Nursery    | Diarrhea                      | Y                                                                             |
| Pig33         | Liver、Lung                                    | Liuan             | suckling   | Diarrhea                      | Y                                                                             |
| Pig34         | Liver、Lung                                    | Liuan             | suckling   | Diarrhea                      | Y                                                                             |
| Pig35         | Liver、Spleen、Lung、Kidney                      | Hefei             | Nursery    | Respiratory symptoms          | Y                                                                             |
| Pig36         | Liver、Spleen、Lung、Kidney                      | Liuan             | Nursery    | Diarrhea                      | Y                                                                             |
| Pig37         | Liver、Spleen、Lung、Kidney、Lymph node           | Liuan             | Nursery    | Diarrhea                      | Y                                                                             |
| Pig38         | Liver、Lung、Kidney                             | Liuan             | Nursery    | Diarrhea                      | N                                                                             |
| Pig39         | Liver、Spleen、Lung、Kidney、Lymph node           | Huaibei           | suckling   | Diarrhea                      | Y                                                                             |

|       |                                         |                   |            |                         |              |
|-------|-----------------------------------------|-------------------|------------|-------------------------|--------------|
| Pig40 | Spleen, Kidney                          | Huaibei           | suckling   | Diarrhea                | Y            |
| Pig41 | Liver, Spleen, Lung, Kidney, Lymph node | Huaibei           | suckling   | Diarrhea                | Y            |
| Pig42 | Liver, Spleen, Lung, Lymph node         | Huaibei           | suckling   | Diarrhea                | Y            |
| Pig43 | Liver, Spleen, Lung, Kidney             | Huai'an (Jiangsu) | Nursery    | Lose weight             | data missing |
| Pig44 | Liver, Spleen, Lung, Kidney             | Huai'an (Jiangsu) | Nursery    | Lose weight             | data missing |
| Pig45 | Liver, Spleen, Lung, Kidney, Lymph node | Huai'an (Jiangsu) | Nursery    | Lose weight             | data missing |
| Pig46 | Liver, Spleen, Lung, Kidney             | Huai'an (Jiangsu) | Nursery    | Lose weight             | data missing |
| Pig47 | Liver, Spleen, Lung, Kidney             | Huai'an (Jiangsu) | Nursery    | Lose weight             | data missing |
| Pig48 | Liver, Spleen, Kidney                   | Huai'an (Jiangsu) | Nursery    | Lose weight             | data missing |
| Pig49 | Liver, Spleen, Lung, Kidney, Lymph node | Chengdu (Sichuan) | Nursery    | Diarrhea                | Y            |
| Pig50 | Liver, Spleen, Lung, Kidney             | Chengdu (Sichuan) | Nursery    | Diarrhea                | Y            |
| Pig51 | Liver, Spleen, Lung,                    | Chengdu (Sichuan) | Nursery    | Diarrhea                | Y            |
| Pig52 | Liver, Spleen, Lung, Kidney             | Hefei             | Nursery    | Respiratory symptoms    | Y            |
| Pig53 | Liver, Spleen, Lung, Kidney, Brain      | Hefei             | Nursery    | Respiratory symptoms    | Y            |
| Pig54 | Liver, Spleen, Lung,                    | Hefei             | Nursery    | Diarrhea                | Y            |
| Pig55 | Liver, Spleen, Lung, Kidney             | Hefei             | Nursery    | Diarrhea                | Y            |
| Pig56 | Liver, Lung                             | Hefei             | Stillbirth | Reproductive disorders  | Y            |
| Pig57 | Liver, Spleen                           | Hefei             | Stillbirth | Reproductive disorders  | Y            |
| Pig58 | Liver, Spleen, Lung                     | Hefei             | Stillbirth | Reproductive disorders  | Y            |
| Pig59 | Liver, Lung                             | Hefei             | Stillbirth | Reproductive disorders  | Y            |
| Pig60 | Liver, Spleen, Lung, Kidney, Brain      | Fuyang            | Nursery    | High fever              | Y            |
| Pig61 | Liver, Spleen, Lung, Kidney, Brain      | Fuyang            | Nursery    | High fever              | Y            |
| Pig62 | Liver, Spleen, Lung                     | Fuyang            | Nursery    | Diarrhea                | Y            |
| Pig63 | Liver, Spleen, Lung                     | Fuyang            | Nursery    | Diarrhea                | Y            |
| Pig64 | Liver, Spleen, Lung, Kidney             | Suzhou            | Nursery    | Diarrhea                | N            |
| Pig65 | Liver, Spleen, Lung, Kidney             | Suzhou            | Nursery    | Diarrhea                | N            |
| Pig66 | Liver, Spleen, Lung, Kidney             | Suzhou            | Nursery    | Diarrhea                | N            |
| Pig67 | Liver, Spleen, Lung, Kidney             | Bengbu            | suckling   | Diarrhea                | N            |
| Pig68 | Liver, Spleen, Lung, Kidney, Lymph node | Bozhou            | Nursery    | High fever, Lose weight | Y            |
| Pig69 | Liver, Spleen, Lung, Kidney, Lymph node | Hefei             | Nursery    | Lose weight             | N            |
| Pig70 | Liver, Spleen, Lung                     | Fuyang            | Nursery    | Diarrhea                | Y            |
| Pig71 | Liver, Spleen, Lung, Kidney             | Fuyang            | Nursery    | Diarrhea                | Y            |
| Pig72 | Liver, Spleen, Lung, Kidney             | Fuyang            | Nursery    | Diarrhea                | Y            |
| Pig73 | Lung                                    | Anqing            | Nursery    | Respiratory symptoms    | data missing |
| Pig74 | Lung                                    | Anqing            | Nursery    | Respiratory symptoms    | data missing |
| Pig75 | Lung                                    | Anqing            | Nursery    | Respiratory symptoms    | data missing |
| Pig76 | Liver, Spleen, Lung, Kidney, Lymph node | Chuzhou           | Unknown    | Unknown                 | data missing |
| Pig77 | Liver, Spleen                           | Chuzhou           | Finishing  | Acute death             | N            |
| Pig78 | Liver, Spleen                           | Chuzhou           | Finishing  | Acute death             | N            |
| Pig79 | Liver, Spleen                           | Chuzhou           | Finishing  | Acute death             | N            |
| Pig80 | Liver, Spleen, Lung, Kidney             | Bozhou            | Nursery    | Diarrhea                | Y            |
| Pig81 | Liver, Spleen, Lung, Brain              | Bozhou            | Nursery    | Diarrhea                | Y            |

|       |                                     |        |           |                                       |              |
|-------|-------------------------------------|--------|-----------|---------------------------------------|--------------|
| Pig82 | Liver、Spleen、Lung、Brain             | Bozhou | Nursery   | Diarrhea                              | Y            |
| Pig83 | Liver、Spleen、Lung、Kidney            | Hefei  | suckling  | Diarrhea                              | data missing |
| Pig84 | Liver、Spleen、Lung、Kidney、Brain      | Hefei  | Finishing | Neurological and respiratory symptoms | N            |
| Pig85 | Liver、Spleen、Lung、Brain             | Hefei  | Finishing | Neurological and respiratory symptoms | Y            |
| Pig86 | Liver、Spleen、Lung                   | Liuan  | Nursery   | Respiratory symptoms                  | N            |
| Pig87 | Liver、Spleen、Lung                   | Liuan  | Nursery   | Respiratory symptoms                  | N            |
| Pig88 | Liver、Spleen、Lung、Kidney、Lymph node | hefei  | Nursery   | Respiratory symptoms                  | data missing |
| Pig89 | Liver、Spleen、Lung、Kidney、Lymph node | hefei  | Nursery   | Respiratory symptoms                  | data missing |
| Pig90 | Liver、Spleen、Lung、Kidney            | Wuhu   | Nursery   | Respiratory symptoms                  | data missing |
| Pig91 | Liver、Spleen、Lung、Kidney、Lymph node | Hefei  | Nursery   | Respiratory symptoms                  | data missing |
| Pig92 | Liver、Spleen、Lung、Lymph node        | Anqing | Finishing | Respiratory symptoms                  | Y            |
| Pig93 | Liver、Spleen、Lung、Kidney、Lymph node | Hefei  | Nursery   | Diarrhea                              | Y            |
| Pig94 | Liver、Spleen、Lung、Kidney、Lymph node | Hefei  | Nursery   | Diarrhea                              | Y            |
